# Supplementary material for: A biocompatible polyurethane fluorescent emulsion with aggregation-induced emission for targeted tumor imaging
Source: Royal Society of Chemistry journal article supplement (doi:10.1039/d2tb02608b), 2023-01-01
Supplement: d2tb02608b1.pdf [file d2tb02608b1.pdf]

## Supporting Information

### A biocompatible polyurethane fluorescent emulsion with aggregation-induced emission for targeting tumor imaging

Yangcen Ou<sup>a</sup>, Xiaofei Wang<sup>a</sup>, Nan He<sup>a</sup>, Xiao Wang<sup>a</sup>, Dan Lu<sup>b</sup>, Zhen Li<sup>a</sup>, Feng Luo<sup>\*a</sup>, Jiehua Li<sup>a</sup>,

Hong Tan<sup>a</sup>

<sup>a</sup> College of Polymer Science and Engineering, State Key Laboratory of Polymer Materials Engineering, Sichuan University, Chengdu 610065, China

<sup>b</sup> Department of Otorhinolaryngology, Head & Neck Surgery, West China Hospital, Sichuan University, Chengdu 610041 Sichuan, China

#### Corresponding Author

\* E-mail addresses: fengluo@scu.edu.cn.

## Supplementary Figures

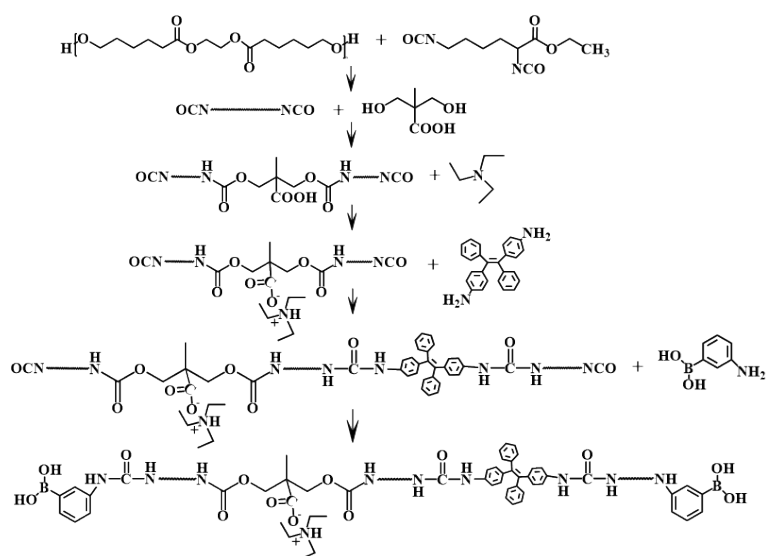

**Fig. S1.** synthetic route of PTP.

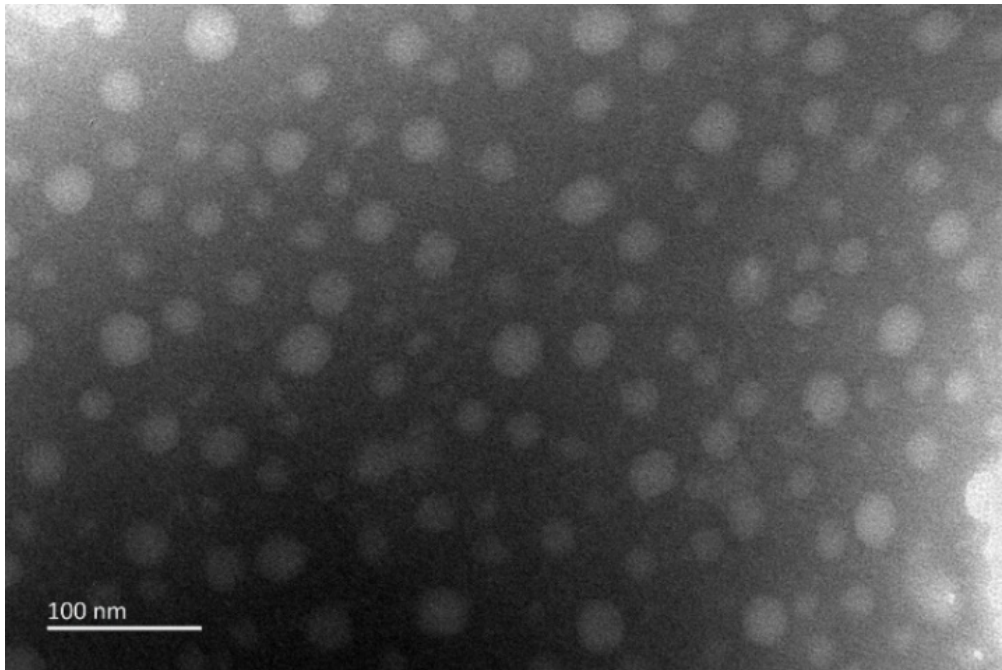

**Fig. S2.** TEM image of PT emulsion.

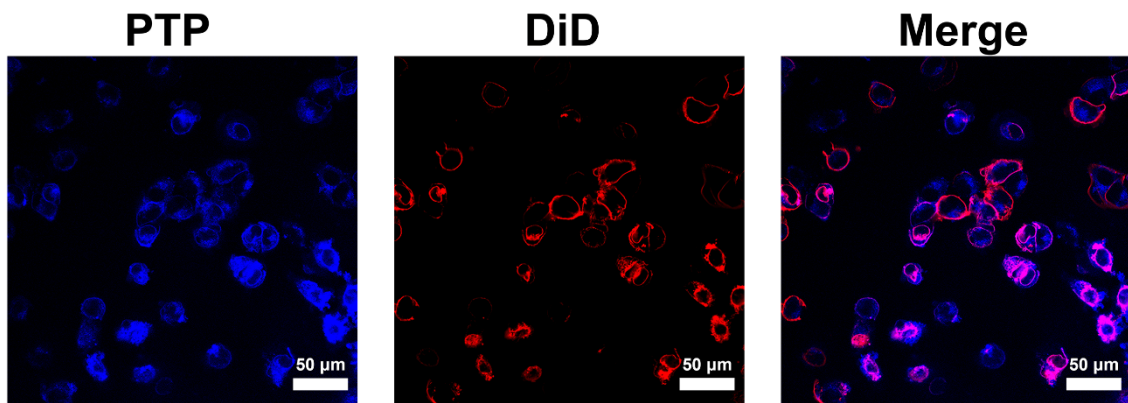

**Fig. S3.** CLSM images of MCF-7 staining with PTP and DiD (dye for labelling cell membranes).

## Supplementary Tables

**Table S1.** PTP emulsion at pH = 7.4

| Time    | Size(nm) | PDI  | Zeta potential (mV) |
|---------|----------|------|---------------------|
| 1 day   | 47.52    | 0.22 | -39.90              |
| 1 week  | 48.27    | 0.22 | -40.40              |
| 2 weeks | 50.81    | 0.23 | -39.67              |
| 1 month | 51.94    | 0.23 | -31.07              |

**Table S2.** PTP emulsion at pH = 6.5

| Time     | Size(nm) | PDI  | Zeta potential (mV) |
|----------|----------|------|---------------------|
| 1 hour   | 55.54    | 0.21 | -23.17              |
| 4 hours  | 55.91    | 0.23 | -22.97              |
| 8 hours  | 62.61    | 0.28 | -23.73              |
| 12 hours | 61.82    | 0.28 | -22.23              |

**Table S3.** PT emulsion at pH = 7.4

| Time    | Size(nm) | PDI  | Zeta potential (mV) |
|---------|----------|------|---------------------|
| 1 day   | 36.25    | 0.19 | -57.03              |
| 1 week  | 46.67    | 0.17 | -48.10              |
| 2 weeks | 46.91    | 0.14 | -45.13              |
| 1 month | 47.07    | 0.12 | -43.7               |

**Table S4.** PT emulsion at pH = 6.5

| Time     | Size(nm) | PDI  | Zeta potential (mV) |
|----------|----------|------|---------------------|
| 1 hour   | 47.63    | 0.11 | -47.9               |
| 4 hours  | 48.97    | 0.12 | -38.10              |
| 8 hours  | 49.33    | 0.11 | -37.30              |
| 12 hours | 49.57    | 0.13 | -28.8               |
